# Supplementary material for: Induction and Maintenance of CX3CR1-Intermediate Peripheral Memory CD8+ T Cells by Persistent Viruses and Vaccines
Source: PubMed Central journal article supplement (PMC5917822; doi:10.1016/j.celrep.2018.03.074), 2018-04-17
Supplement: mmc1.pdf [file mmc1.pdf]

**Cell Reports, Volume 23**

**Supplemental Information**

**Induction and Maintenance of CX3CR1-Intermediate**

**Peripheral Memory CD8<sup>+</sup> T Cells by Persistent**

**Viruses and Vaccines**

**Claire Louse Gordon, Lian Ni Lee, Leo Swadling, Claire Hutchings, Madeleine Zinser, Andrew John Highton, Stefania Capone, Antonella Folgori, Eleanor Barnes, and Paul Klenerman**

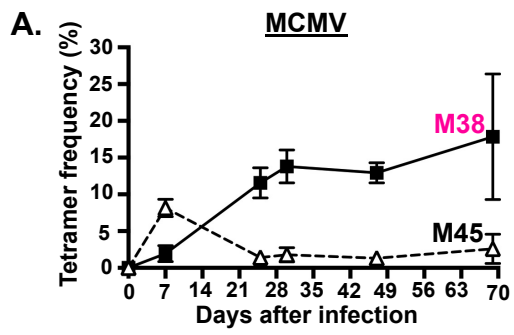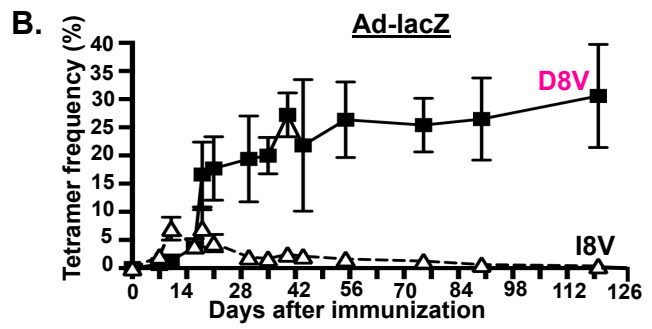

**Figure S1: MCMV infection and Ad-lacZ immunization induces conventional and inflating CD8<sup>+</sup> T cell memory responses, related to Figures 1 and 2**

*Cx3cr1<sup>+/gfp+</sup>* mice were infected intravenously (iv) with 10<sup>6</sup> pfus MCMV or 2x10<sup>9</sup> pfu Ad-lacZ and blood was serially sampled post-immunization (dpi). Conventional memory responses (black label) were assessed by M45 (MCMV)- and I8V(Ad-lacZ)- tetramer staining, and inflationary memory responses (pink label) were assessed M38(MCMV)- and D8V(Ad-lacZ)- tetramer staining (coloring is consistent for all Supplemental Figures). (A) Compiled results showing mean ( $\pm$ SD) tetramer frequency of M45- (open triangle, dotted line) and M38- (filled square, solid line)-tetramer<sup>+</sup> CD8<sup>+</sup> T cells (n=2-4). (B) Compiled results showing mean ( $\pm$ SD) I8V- (open triangle, dotted line) and D8V- (filled square, solid line) tetramer<sup>+</sup> CD8<sup>+</sup> T cells (n=3-19).

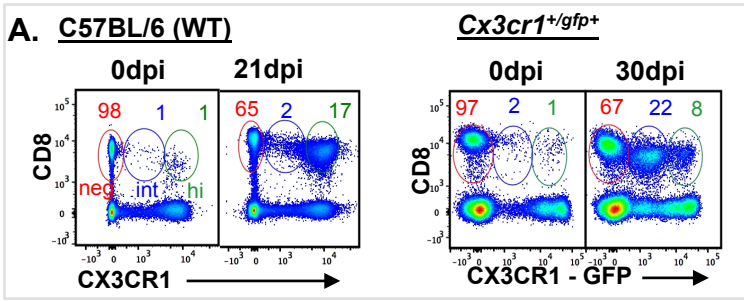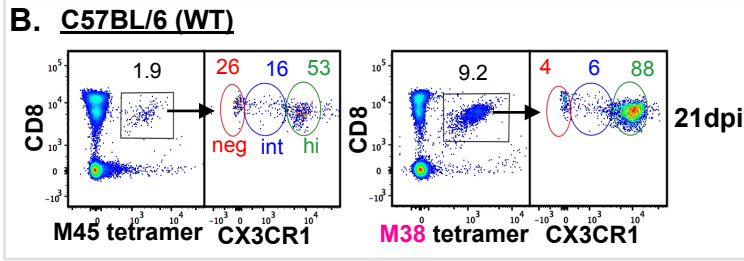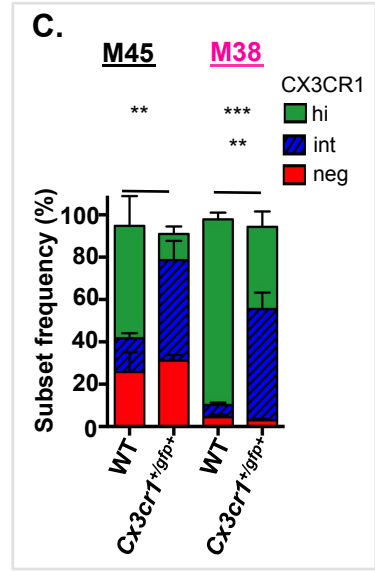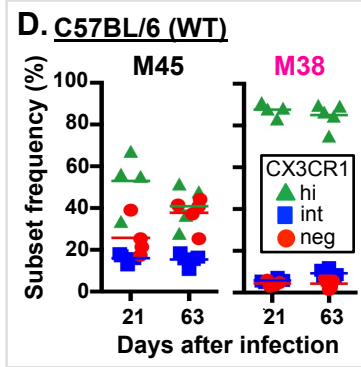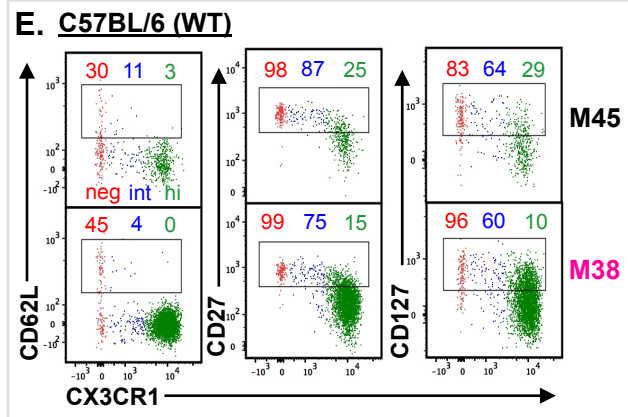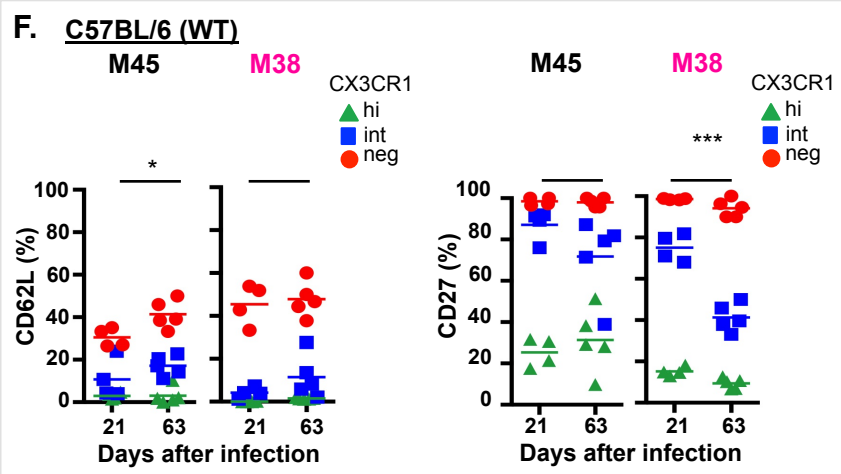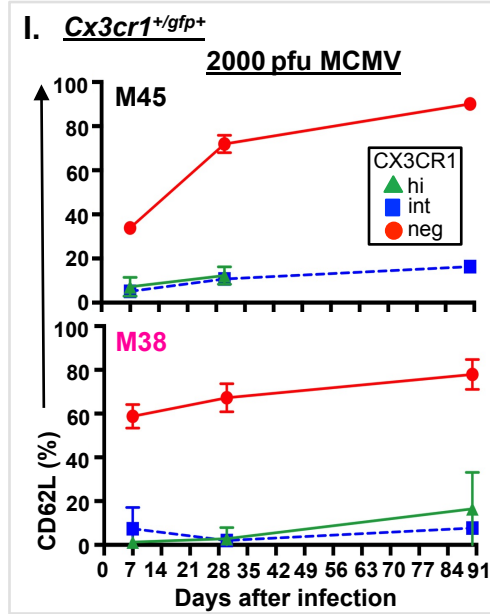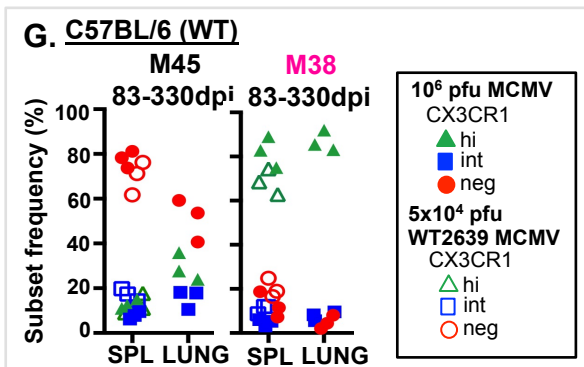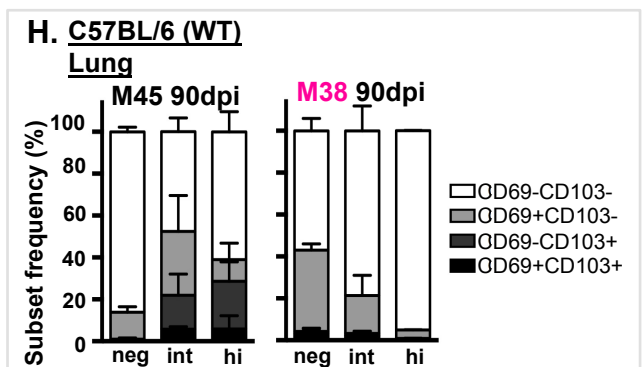

**Figure S2: MCMV infection induces three distinct CD8<sup>+</sup> T cell populations based on CX3CR1 expression in C57BL/6 and *Cx3cr1*<sup>+gfp+</sup> mice, related to Figure 1**

*Cx3cr1*<sup>+gfp+</sup> and C57BL/6 (wild type; WT) mice were infected intravenously (iv) with 10<sup>6</sup> pfu or 2000 pfu MCMV. Conventional memory and inflationary memory responses were assessed by M45- and M38-tetramer staining, respectively. (A) Composite FACS plots of CD8 and CX3CR1 staining of live lymphocytes in blood from C57BL/6 (left panel) or *Cx3cr1*<sup>+gfp+</sup> (right panel) mice at 0 days post infection (dpi), 21dpi (C57BL/6) or 30 dpi (*Cx3cr1*<sup>+gfp+</sup>) with 10<sup>6</sup> pfu MCMV. Mean percentages of CX3CR1 subsets (negative[neg]=red, intermediate[int]=blue, high[hi]=green) of live CD8<sup>+</sup> T cells are indicated (C57BL/6 n=4 mice, *Cx3cr1*<sup>+gfp+</sup> n=3 mice). (B) Composite FACS plots of M45- and M38-tetramer staining of live lymphocytes (left) and CX3CR1 subsets of tetramer-specific CD8<sup>+</sup> T cells (right) in blood from C57BL/6 mice, 21 dpi with 10<sup>6</sup> pfu MCMV. Mean live tetramer<sup>+</sup> CD8<sup>+</sup> T cells and mean CX3CR1 subsets are indicated (n=4). (C) Compiled results comparing mean (±SD) of CX3CR1 subsets (neg=red, int=blue, hi=green) of M45- and M38-tetramer<sup>+</sup> CD8<sup>+</sup> T cells in blood from C57BL/6 (WT) or *Cx3cr1*<sup>+gfp+</sup> mice, 21 or 30 dpi with 10<sup>6</sup> pfu MCMV, respectively (C57BL/6 n=4 mice, *Cx3cr1*<sup>+gfp+</sup> n=3 mice). (D) Individual CX3CR1 subset frequencies and means of M45- and M38-tetramer<sup>+</sup> CD8<sup>+</sup> T cells in blood from C57BL/6 (WT) mice 21 and 63 dpi (n=4 and n=5, respectively). (E-F) Expression of cell surface markers CD62L, CD27 and CD127 by CX3CR1 subsets in M45- and M38-tetramer<sup>+</sup> CD8<sup>+</sup> T cells in C57BL/6 mice 21 or 63 dpi with 10<sup>6</sup> pfu MCMV. (E) Composite FACS plots of CD62L (left panel), CD27 (middle panel) and CD127 (right panel) expression in M45- and M38-tetramer<sup>+</sup> CD8<sup>+</sup> T cells at 21 dpi. Mean expression of indicated marker for each CX3CR1 subset is shown (n=4). (F) Shown are individual and mean CX3CR1 subset expression of CD62L (left panel) and CD27 (right panel) in M45- and M38-tetramer<sup>+</sup> CD8<sup>+</sup> T cells in blood from C57BL/6 (WT) mice 21 and 63 dpi (n=4/each and n=5/each, respectively). (G) CX3CR1 subset distribution of M38- and M45- tetramer<sup>+</sup> cells was assessed in spleen (SPL), liver (LIV) and lung of C57BL/6 (WT) mice following infection with 10<sup>6</sup> pfu (solid symbols, 330dpi) or 50000 pfu (open symbols, 83dpi) of WT2639 MCMV (considered to be a full dose). (H) Frequency of co-expression of CD69 and CD103 in M45- and M38-tetramer<sup>+</sup> CD8<sup>+</sup> T cells in lung from C57BL/6 mice 83dpi (n=3). (I) Compiled results showing mean (±SD) CD62L expression by CX3CR1 subsets in M45- and M38-tetramer<sup>+</sup> CD8<sup>+</sup> T cells following infection with 2000 pfu MCMV (n=5-9). Significant differences were determined by 1-way ANOVA and corrected for multiple comparisons (Holm-Sidak). P=0.05 to 0.011 (\*), p=0.01 to 0.001 (\*\*) and p<0.001 (\*\*\*). All FACS plots are composite plots generated by randomly selecting equal numbers of the cell population of interest from each subject.

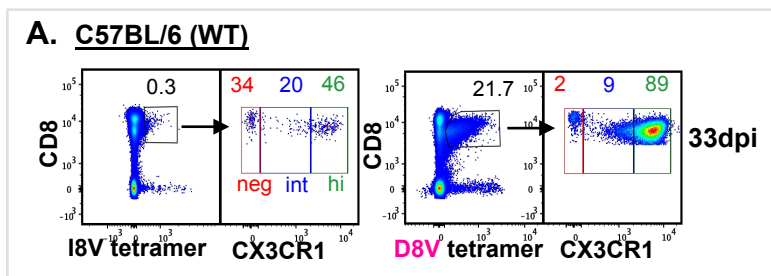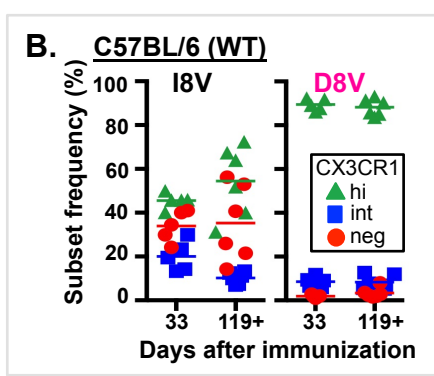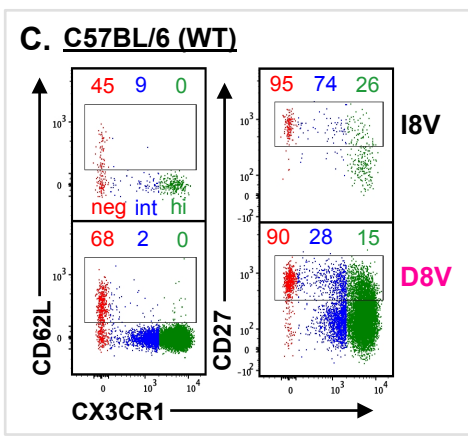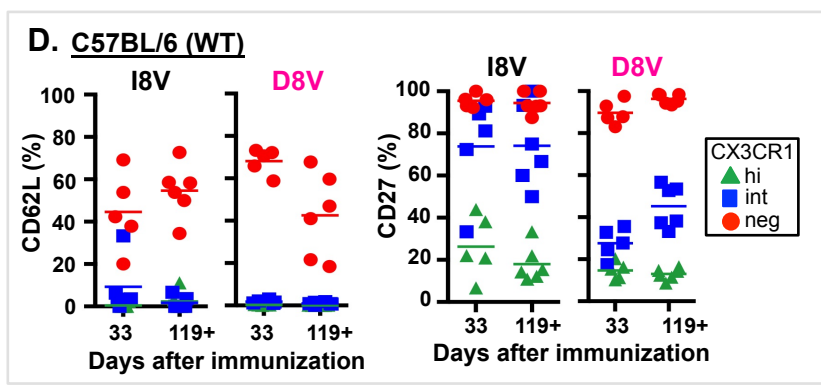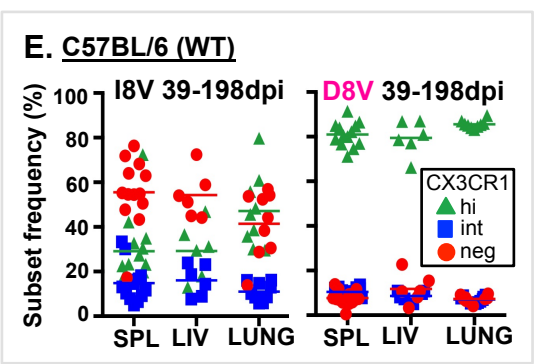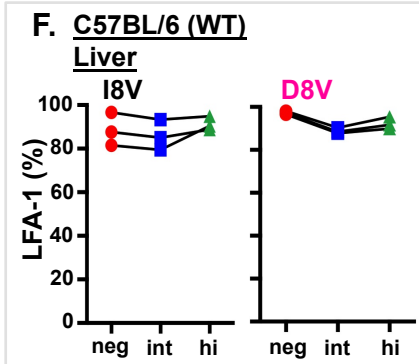

**Figure S3: Ad-lacZ immunization induces three distinct CD8<sup>+</sup> T cell populations based on CX3CR1 expression in C57BL/6 mice, related to Figure 2**

C57BL/6 (wild type; WT) mice were infected intravenously (iv) with  $2 \times 10^9$  pfu of a recombinant replication-deficient HuAd5 vector expressing lacZ (Ad-lacZ). Conventional memory and inflationary memory responses were assessed by I8V- and D8V-tetramer staining, respectively. (A) Composite FACS plots of I8V- and D8V-tetramer staining of live lymphocytes (left) and CX3CR1 subsets of tetramer-specific CD8<sup>+</sup> T cells (right) in blood from C57BL/6 (WT) mice at 33 days post immunization (dpi) with  $2 \times 10^9$  pfu Ad-lacZ. Mean CX3CR1 subsets (negative[neg]=red, intermediate[int]=blue, high[hi]=green) of live CD8<sup>+</sup> T cells are indicated (n=4 mice). (B) Shown are individual and mean CX3CR1 subset frequency of I8V- and D8V-tetramer<sup>+</sup> CD8<sup>+</sup> T cells in blood from C57BL/6 (WT) mice 33 and 119+ dpi (n=5 and n=6, respectively). (C-D) Expression of cell surface markers CD62L and CD27 by CX3CR1 subsets in I8V- and D8V-tetramer<sup>+</sup> CD8<sup>+</sup> T cells in C57BL/6 mice 33 or 119+ dpi with  $2 \times 10^9$  pfu Ad-lacZ. (C) Shown is representative flow cytometry plots of CD62L (left panel) and CD27 (middle panel) expression in I8V- and D8V-tetramer<sup>+</sup> CD8<sup>+</sup> T cells at 33 dpi. Mean expression of indicated marker for each CX3CR1 subset is shown (n=5). (D) Individual and mean CX3CR1 subset expression of CD62L (left panel) and CD27 (right panel) in I8V- and D8V-tetramer<sup>+</sup> CD8<sup>+</sup> T cells in blood from C57BL/6 (WT) mice 33 and 119+ dpi (n=5 and n=6, respectively). (E) Individual and mean CX3CR1 subset frequencies of I8V- and D8V- tetramer<sup>+</sup> cells in spleen (SPL), liver (LIV) and lung 39-198dpi (n=6-13). (F) Expression of LFA-1 in I8V- and D8V-tetramer<sup>+</sup> CD8<sup>+</sup> T cells in liver from C57BL/6 mice 198dpi (n=3). Significant differences were determined by one-way ANOVA and corrected for multiple comparisons (Holm-Sidak). P=0.05 to 0.011 (\*), p=0.01 to 0.001 (\*\*) and p<0.001 (\*\*\*). All FACS plots are composite plots generated by randomly selecting equal numbers of the cell population of interest from each subject.

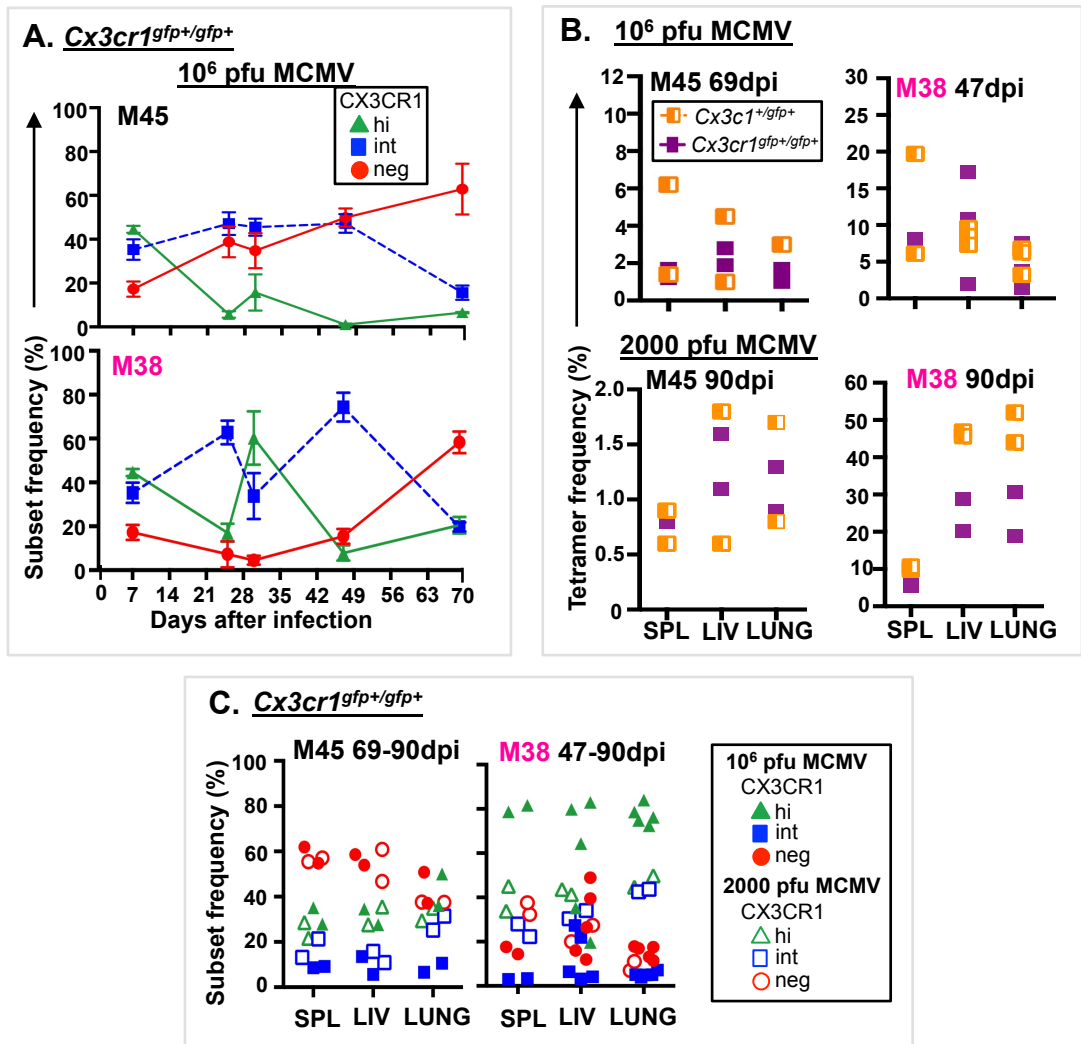



**Figure S4: CX3CR1 is not required for optimal inflating responses following MCMV infection, related to Figure 4**

*Cx3cr1<sup>gfp+/gfp+</sup>* and *Cx3cr1<sup>+gfp</sup>* mice were infected intravenously (iv) with 10<sup>6</sup> pfu or 2000 pfu MCMV and blood was serially sampled up to 70 days post-infection (dpi). Memory responses were assessed by M45 and M38 tetramer staining. (A) Compiled results showing mean ( $\pm$ SD) CX3CR1 subsets (neg=red circle, int=blue square, hi=green triangle) of M45- and M38-tetramer<sup>+</sup> CD8<sup>+</sup> T cells in *Cx3cr1<sup>gfp+/gfp+</sup>* mice following infection with 10<sup>6</sup> pfu MCMV (n=2-4 mice/each). (B) Individual tetramer frequencies of M45- and M38-tetramer<sup>+</sup> CD8<sup>+</sup> T cells in spleen (SPL), liver (LIV) and lung from *Cx3cr1<sup>+gfp</sup>* (orange half filled square, n=2-3 mice/each) and *Cx3cr1<sup>gfp+/gfp+</sup>* (purple filled square, n=3-4 mice/each) mice 47-90 dpi infection with 10<sup>6</sup> pfu (top panel) or 2000 pfu (bottom panel) MCMV. (C) Shown are individual CX3CR1 subset frequencies for M45- and M38-tetramer<sup>+</sup> CD8<sup>+</sup> T cells in indicated tissues, 47-90 dpi with 10<sup>6</sup> pfu (closed symbol) or 2000 pfu (open symbol) MCMV. Significant were determined by one-way ANOVA and corrected for multiple comparisons (Holm-Sidak). P=0.05 to 0.011 (\*), p=0.01 to 0.001 (\*\*) and p<0.001 (\*\*\*).

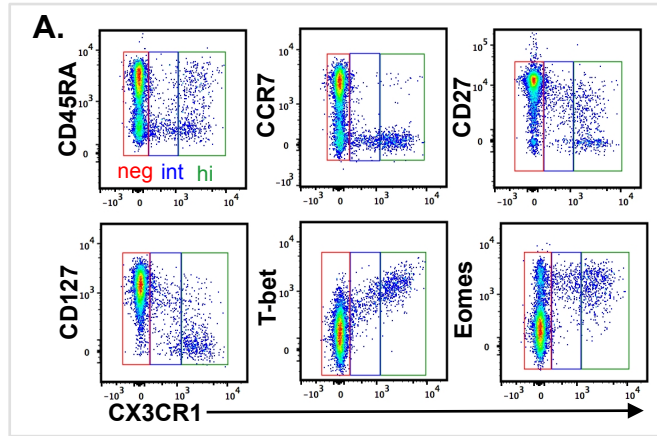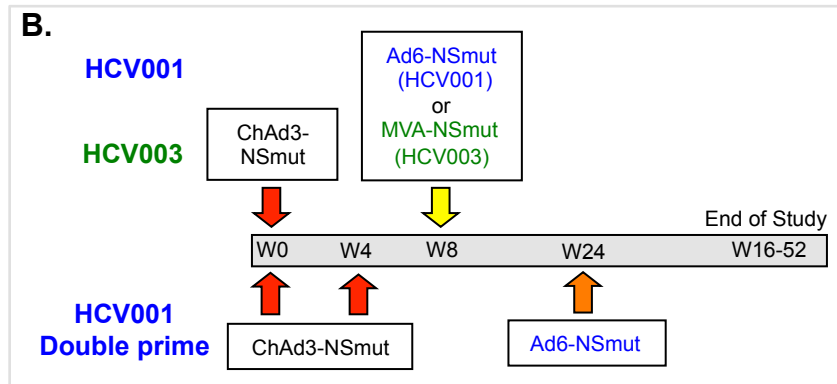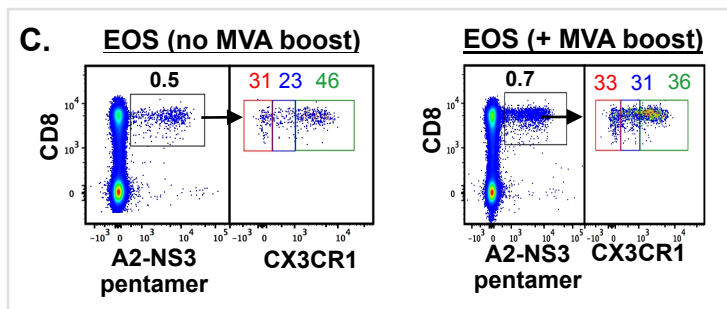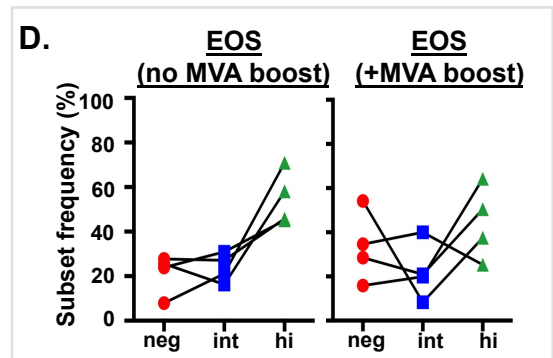

**Figure S5: Phenotype of CX3CR1 subsets on polyclonal and adenoviral vaccine-derived CD8<sup>+</sup> T cells, related to Figures 5-6**

(A) Expression of cell surface markers (CD27 and CD127) and transcription factors (T-bet, Eomes) by CX3CR1 subset was assessed in A2-NS3 pentamer-negative CD8<sup>+</sup> T cells in blood taken from 5 volunteers. Shown are composite FACS plots (n=5) of CX3CR1 expression and indicated marker, gated on live CD8<sup>+</sup> T cells with CX3CR1 subset highlighted (neg=red, int=blue, hi=green). (B) Schematic of vaccination protocol. All volunteers received a priming regimen of a replicative defective simian adenoviral vector (ChAd3,  $5 \times 10^8$  -  $2.5 \times 10^{10}$  viral particles) encoding the NS3, NS4, NS5A, and NS5B proteins of HCV genotype 1b (ChAd3-NSmut) (Swadling et al., 2014). A subset of 5 volunteers also received a boost with a modified vaccinia Ankara (MVA,  $2 \times 10^7$  -  $2 \times 10^8$  pfu) vector encoding the same HCV genotype 1b proteins (MVA-NSmut) 8 weeks (W) later (Table S2). (C) Blood samples were taken at end of study (TW16-32, "EOS") from all volunteers. Vaccine-derived CD8<sup>+</sup> T cells were assessed by staining with HLA-A2 pentamers containing an NS3 epitope (A2-NS3 pentamer; see Table S3 for pentamer details). Shown is composite FACS plots of A2-NS3 pentamer staining (left) of live CD3<sup>+</sup> lymphocytes, and CX3CR1 subsets of A2-NS3 pentamer<sup>+</sup> CD8<sup>+</sup> T cells at EOS in volunteers who did not receive the MVA boost (left, n=4) and those who did (right, n=5). Mean A2-NS3 pentamer<sup>+</sup> CD8<sup>+</sup> T cell frequency and mean CX3CR1 subset frequency is indicated. (D) Individual CX3CR1 subset frequency of A2-NS3 pentamer<sup>+</sup> CD8<sup>+</sup> T cells at EOS in volunteers who did not receive the MVA boost (left, n=4) and those who did (right, n=5).

**Table S1: Number of CD8<sup>+</sup> T cells isolated from tissues of *Cx3cr1*<sup>+/*gfp*+ and *Cx3cr1*<sup>*gfp*+/*gfp*+ mice, related to Figure 4</sup></sup>**

| Tissue         | Mean number of CD8 <sup>+</sup> T cells<br>(no. of mice) |                                                   | P value |
|----------------|----------------------------------------------------------|---------------------------------------------------|---------|
|                | <i>Cx3cr1</i> <sup>+/<i>gfp</i>+ </sup>                  | <i>Cx3cr1</i> <sup><i>gfp</i>+/<i>gfp</i>+ </sup> |         |
| <i>MCMV</i>    |                                                          |                                                   |         |
| Spleen         | 2.7x10 <sup>8</sup> (3)                                  | 3.3x10 <sup>8</sup> (4)                           | 0.59    |
| Liver          | 2.6x10 <sup>7</sup> (3)                                  | 7.6x10 <sup>6</sup> (4)                           | 0.06    |
| Lung           | 1.7x10 <sup>7</sup> (3)                                  | 2.9x10 <sup>7</sup> (4)                           | 0.33    |
| <i>Ad-lacZ</i> |                                                          |                                                   |         |
| Spleen         | 2.3x10 <sup>7</sup> (3)                                  | 8.9x10 <sup>6</sup> (5)                           | 0.13    |
| Liver          | 1.6x10 <sup>6</sup> (4)                                  | 9.9x10 <sup>5</sup> (5)                           | 0.12    |
| Lung           | 1.4x10 <sup>6</sup> (4)                                  | 9.1x10 <sup>5</sup> (5)                           | 0.36    |

**Table S2: Characteristics of 13 volunteers used for this study, related to Figures 5-7 and Figure S5**

| <b>Volunteer#</b> | <b>Age</b> | <b>Sex</b> | <b>CMV IgG</b> | <b>ChAd3 prime</b> | <b>MVA boost</b> | <b>HCV pentamer<sup>a</sup></b> | <b>CMV tetramer<sup>a</sup></b> |
|-------------------|------------|------------|----------------|--------------------|------------------|---------------------------------|---------------------------------|
| <b>006</b>        | 29         | M          | -              | +                  | -                | A2-NS3                          | NA                              |
| <b>038</b>        | 25         | F          | +              | +                  | -                | A2-NS3                          | NA                              |
| <b>060</b>        | 24         | F          | -              | +                  | -                | A2-NS3                          | NA                              |
| <b>068</b>        | 27         | F          | -              | +                  | -                | A2-NS3                          | NA                              |
| <b>332</b>        | 21         | M          | -              | +                  | +                | A2-NS3                          | NA                              |
| <b>339</b>        | 37         | F          | +              | +                  | +                | A2-NS3                          | A2-pp65                         |
| <b>343</b>        | 31         | M          | -              | +                  | +                | A2-NS3                          | NA                              |
| <b>345</b>        | 21         | F          | +              | +                  | +                | A2-NS3                          | A2-pp65                         |
| <b>347</b>        | 26         | M          | +              | +                  | +                | A2-NS3                          | NA                              |
| <b>039</b>        | 44         | M          | +              | NA                 | NA               | NA                              | A2-pp65                         |
| <b>400</b>        | 28         | M          | +              | NA                 | NA               | NA                              | B7-pp65                         |
| <b>401</b>        | 30         | F          | +              | NA                 | NA               | NA                              | A2-pp65, A1-pp50                |
| <b>403</b>        | 54         | M          | +              | NA                 | NA               | NA                              | A2-pp65                         |

<sup>a</sup>See Table S3 for tetramer and pentamer details

Abbreviations: Male (M), female (F), not applicable (NA), positive (+), negative (-), hepatitis C virus (HCV),

**Table S3: List of vaccine pentamers and CMV tetramers used for studies antigen-specific CD8<sup>+</sup> T cells, related to Experimental Procedures**

| HLA type     | Target-epitope               | Amino acid sequence | Abbreviation | Source                                         |
|--------------|------------------------------|---------------------|--------------|------------------------------------------------|
| <i>Human</i> |                              |                     |              |                                                |
| A*0101       | CMV-pp50 <sub>245-253</sub>  | VTEHDTLLY           | A1-pp65      | NIH Tetramer Facility <sup>a</sup>             |
| A*0201       | CMV-pp65 <sub>495-503</sub>  | NLVPMVATV           | A2-pp65      | NIH Tetramer Facility <sup>a</sup> , Proimmune |
| B*0702       | CMV-pp65 <sub>417-426</sub>  | TPRVTGGGAM          | B7-pp65      | NIH Tetramer Facility <sup>a</sup>             |
| A*0201       | HCV-NS3 <sub>1406-1415</sub> | KLSGLGINAV          | A2-NS3       | Proimmune                                      |
| <i>Mouse</i> |                              |                     |              |                                                |
| H-2Db        | MCMV-M45 <sub>985-993</sub>  | HGIRNASFI           | M45          | NIH Tetramer Facility <sup>a</sup>             |
| H-2Kb        | MCMV-M38 <sub>316-324</sub>  | SSPPMFRV            | M38          | NIH Tetramer Facility <sup>a</sup>             |
| H-2Kb        | bgal <sub>497-504</sub>      | ICPMYARV            | I8V          | NIH Tetramer Facility                          |
| H-2Kb        | bgal <sub>96-103</sub>       | DAPIYTNV            | D8V          | NIH Tetramer Facility <sup>a</sup>             |

<sup>a</sup>Peptide for monomer construction was obtained from Proimmune.

**Table S4: Fluorochrome-conjugated antibodies used in flow cytometry, related to Experimental Procedures**

| <b>Antibody</b> | <b>Fluorochrome</b> | <b>Clone</b> | <b>Manufacturer<sup>a</sup></b> |
|-----------------|---------------------|--------------|---------------------------------|
| <i>Human</i>    |                     |              |                                 |
| CD3             | PO                  | UCHT1        | Life Technologies               |
| CD8             | AF700               | SK1          | BioLegend                       |
| CCR7            | PerCp-Cy5.5         | G04H37       | BioLegend                       |
| CD45RA          | FITC                | HI100        | Beckton Dickinson               |
| CX3CR1          | BV421               | 2A9-1        | BioLegend                       |
| CD27            | PE-Cy7              | LG.3A10      | BioLegend                       |
| CD127           | PE/Dazzle594        | A019D5       | BioLegend                       |
| T-bet           | BV605               | 4B10         | BioLegend                       |
| Eomes           | eF660               | WD1928       | eBioscience                     |
| Viability       | LIVE/DEAD near IR   | NA           | Life Technologies               |
| <i>Mouse</i>    |                     |              |                                 |
| CD8             | eF450               | 53-6.7       | eBioscience                     |
| CX3CR1          | BV421               | SA011F11     | BioLegend                       |
| CD62L           | AF700               | MEL-14       | BioLegend                       |
| CD27            | FITC                | LG.7F9       | eBioscience                     |
| CD27            | PerCp-Cy5.5         | LG3A.10      | BioLegend                       |
| CD127           | PE-Cy7              | A7R34        | eBioscience                     |
| Thy1.2          | AF700               | 53-2.1       | BioLegend                       |
| Viability       | LIVE/DEAD near IR   | NA           | Life Technologies               |

<sup>a</sup> Antibodies were obtained from BD Biosciences (Oxford, UK), eBioscience (Loughborough, UK), BioLegend (London, UK) and Life Technologies (Loughborough, UK).

Abbreviations: Pacific orange (PO), alexa Fluor (AF), allophycocyanin (APC), brilliant violet (BV), eFluor (eF), infrared (IR), peridinin-chlorophyll-protein (PerCP), phycoerythrin (PE) and fluorescein isothiocyanate (FITC).

Italics denote the species specificity of the antibody
